# Supplementary material
Source: PubMed Central journal article supplement (PMC4572536)
Supplement: JCM.01366-15_zjm999094522so1.pdf [file JCM.01366-15_zjm999094522so1.pdf]

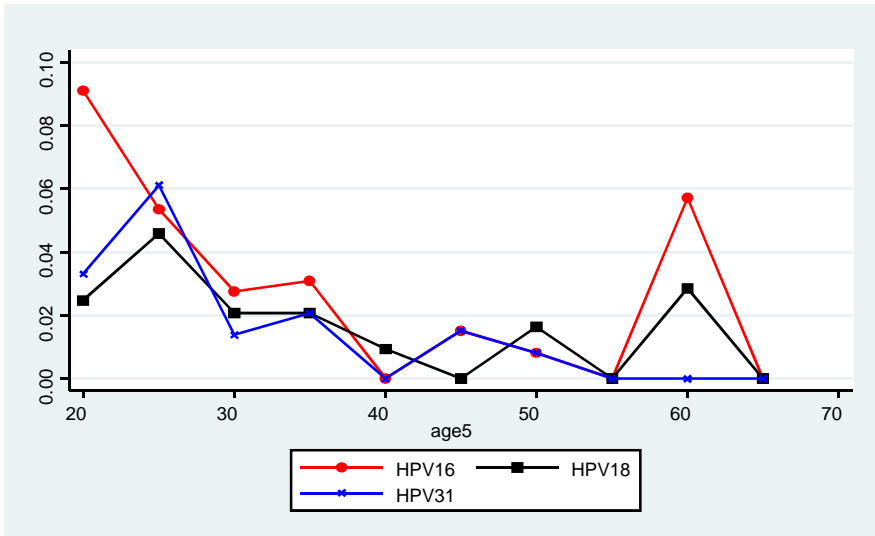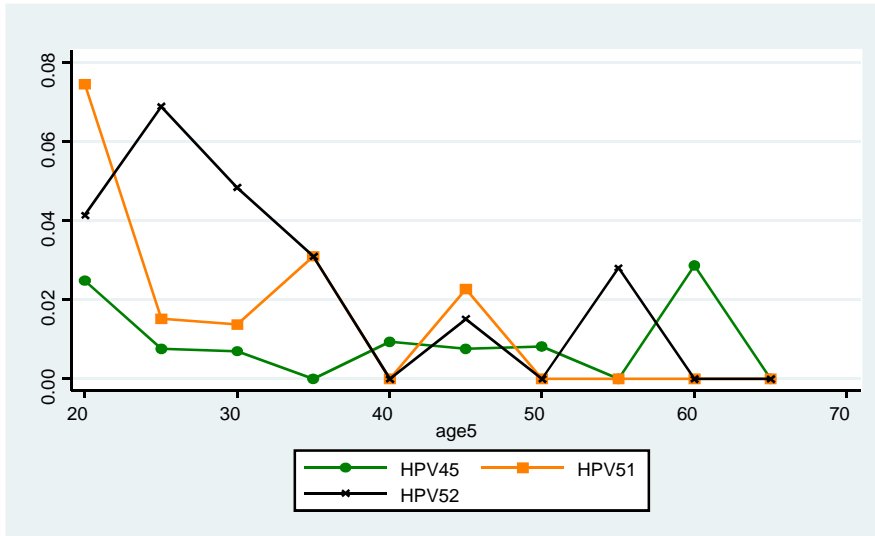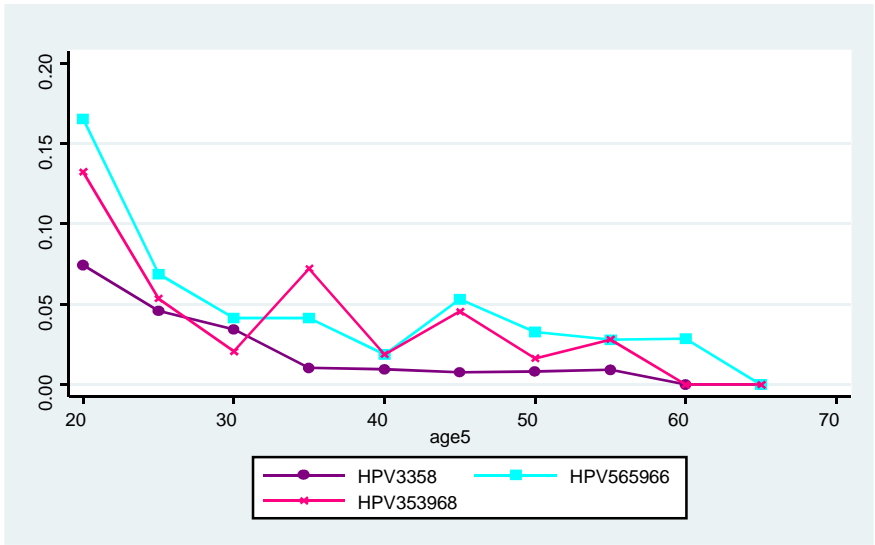

**Supplementary Data 1 - Type specific prevalence of HPV types according to age in the Scottish Screening population. Graphs A and B detail types individually resolved by the Onclarity assay (16,18,31,45,51,52) with graph C showing prevalence according to the 3 pools of types: 33/58, 56/59/66, 35,39,68).**
